# Supplementary material
Source: Springer Nature journal article supplement (https://www.springermedizin.de/resource/supplementary/12885_2010_2490_MOESM4_ESM.pdf/9461434)

Aggregate Cycle Threshold (CT)

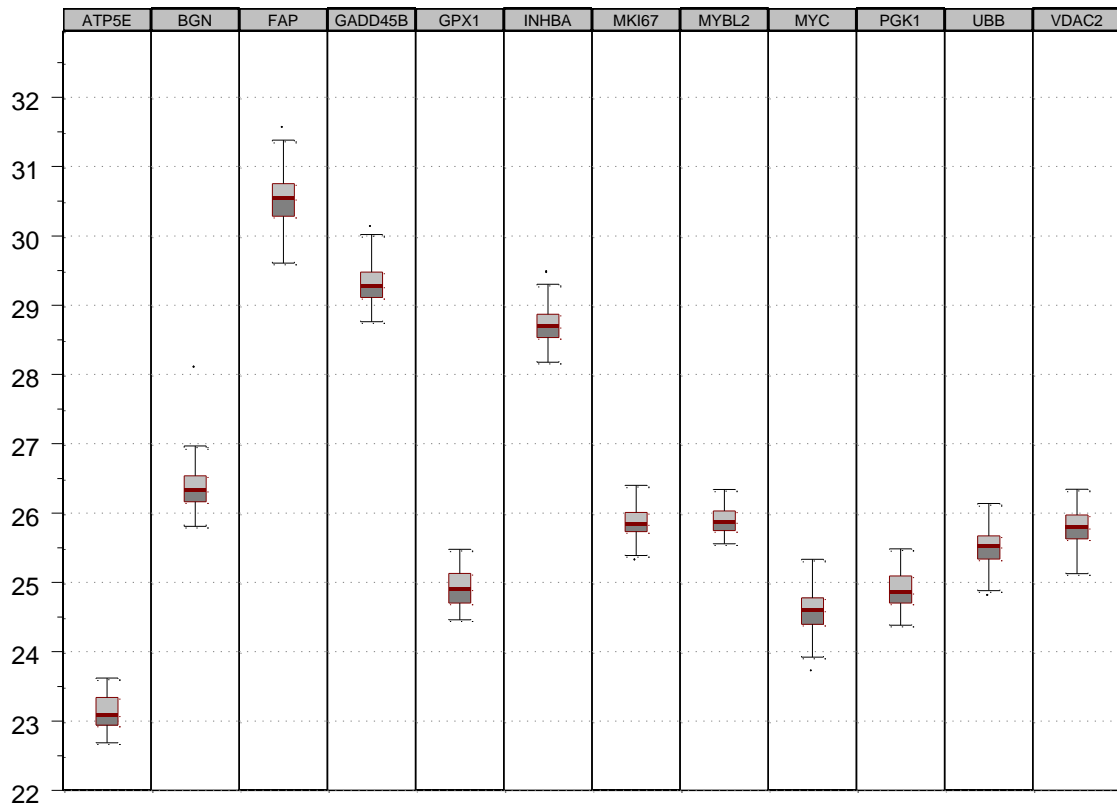

Supplement: MOESM4 [file 9461434]
